# Supplementary material for: Cytotoxic T Lymphocyte-Associated Antigen 4 Gene Polymorphisms and Autoimmune Thyroid Diseases: An Updated Systematic Review and Cumulative Meta-Analysis
Source: Hindawi journal article supplement (doi:10.1155/2015/747816), 2015-01-01
Supplement: f1 [file 747816.f1.pdf]

## Supplemental Figures

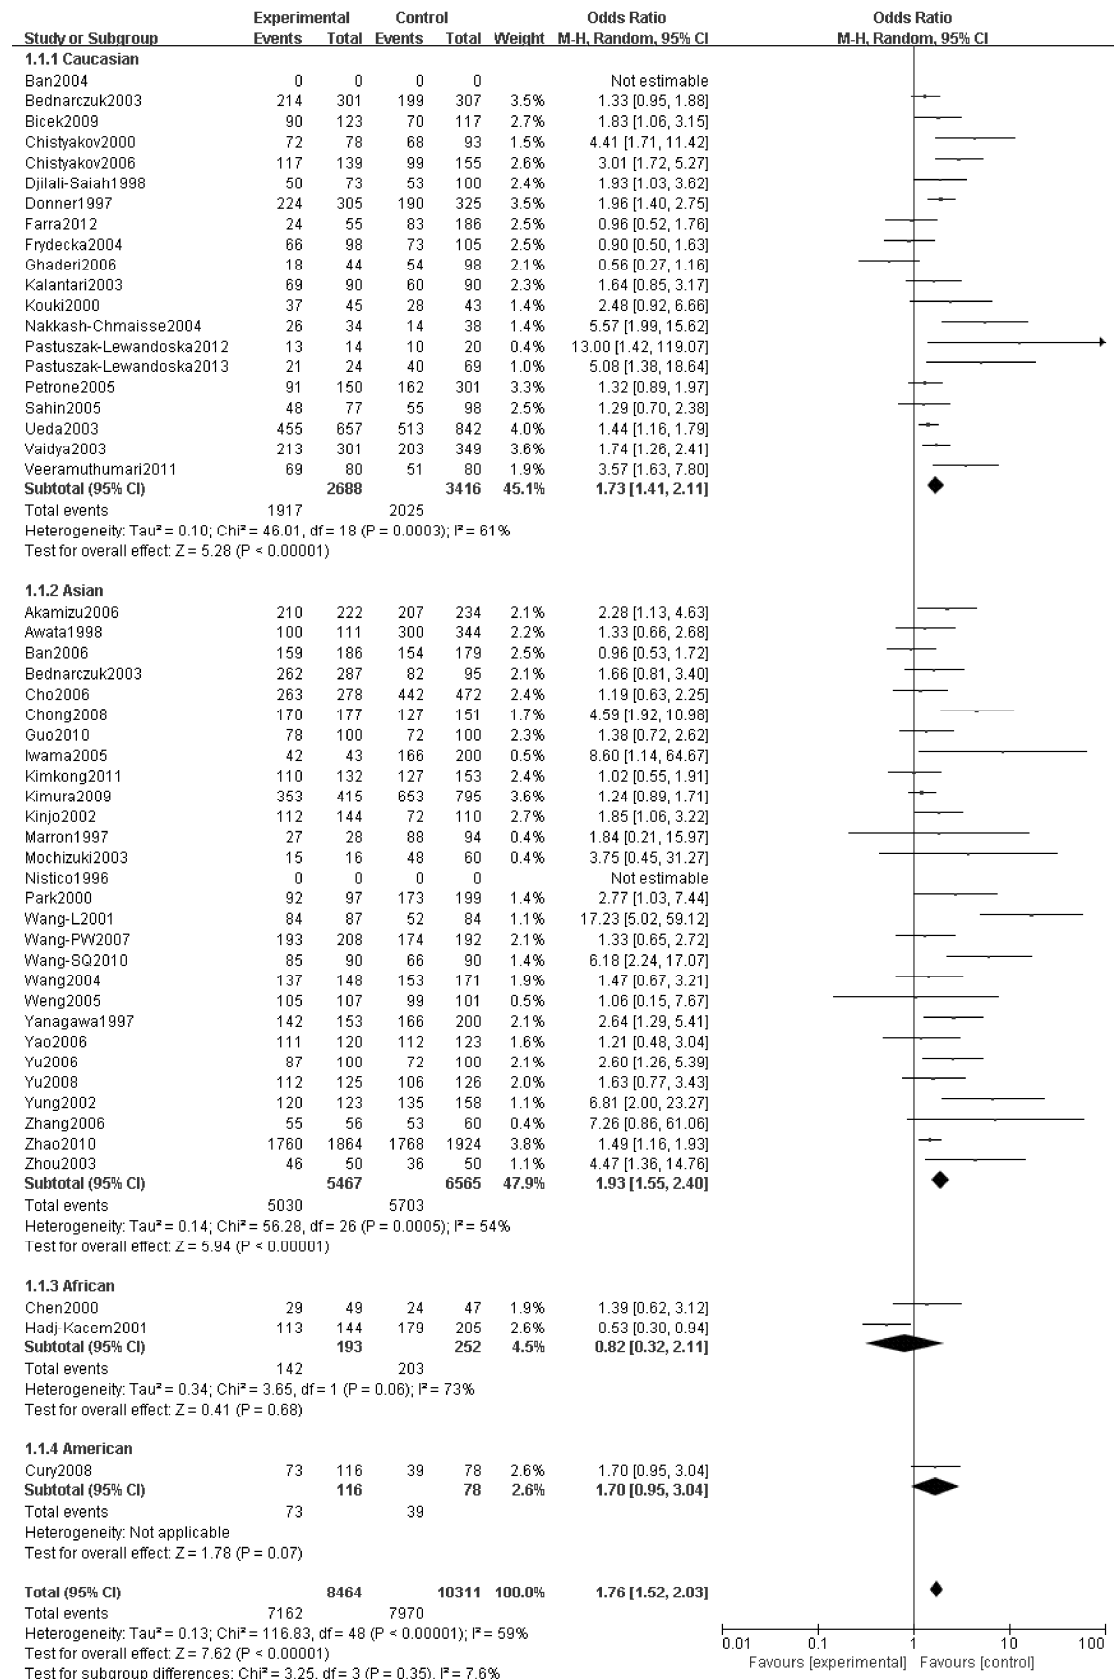

Supplemental Figure 1 Forest plot of the association between a dominant model of A49G polymorphism and GD.

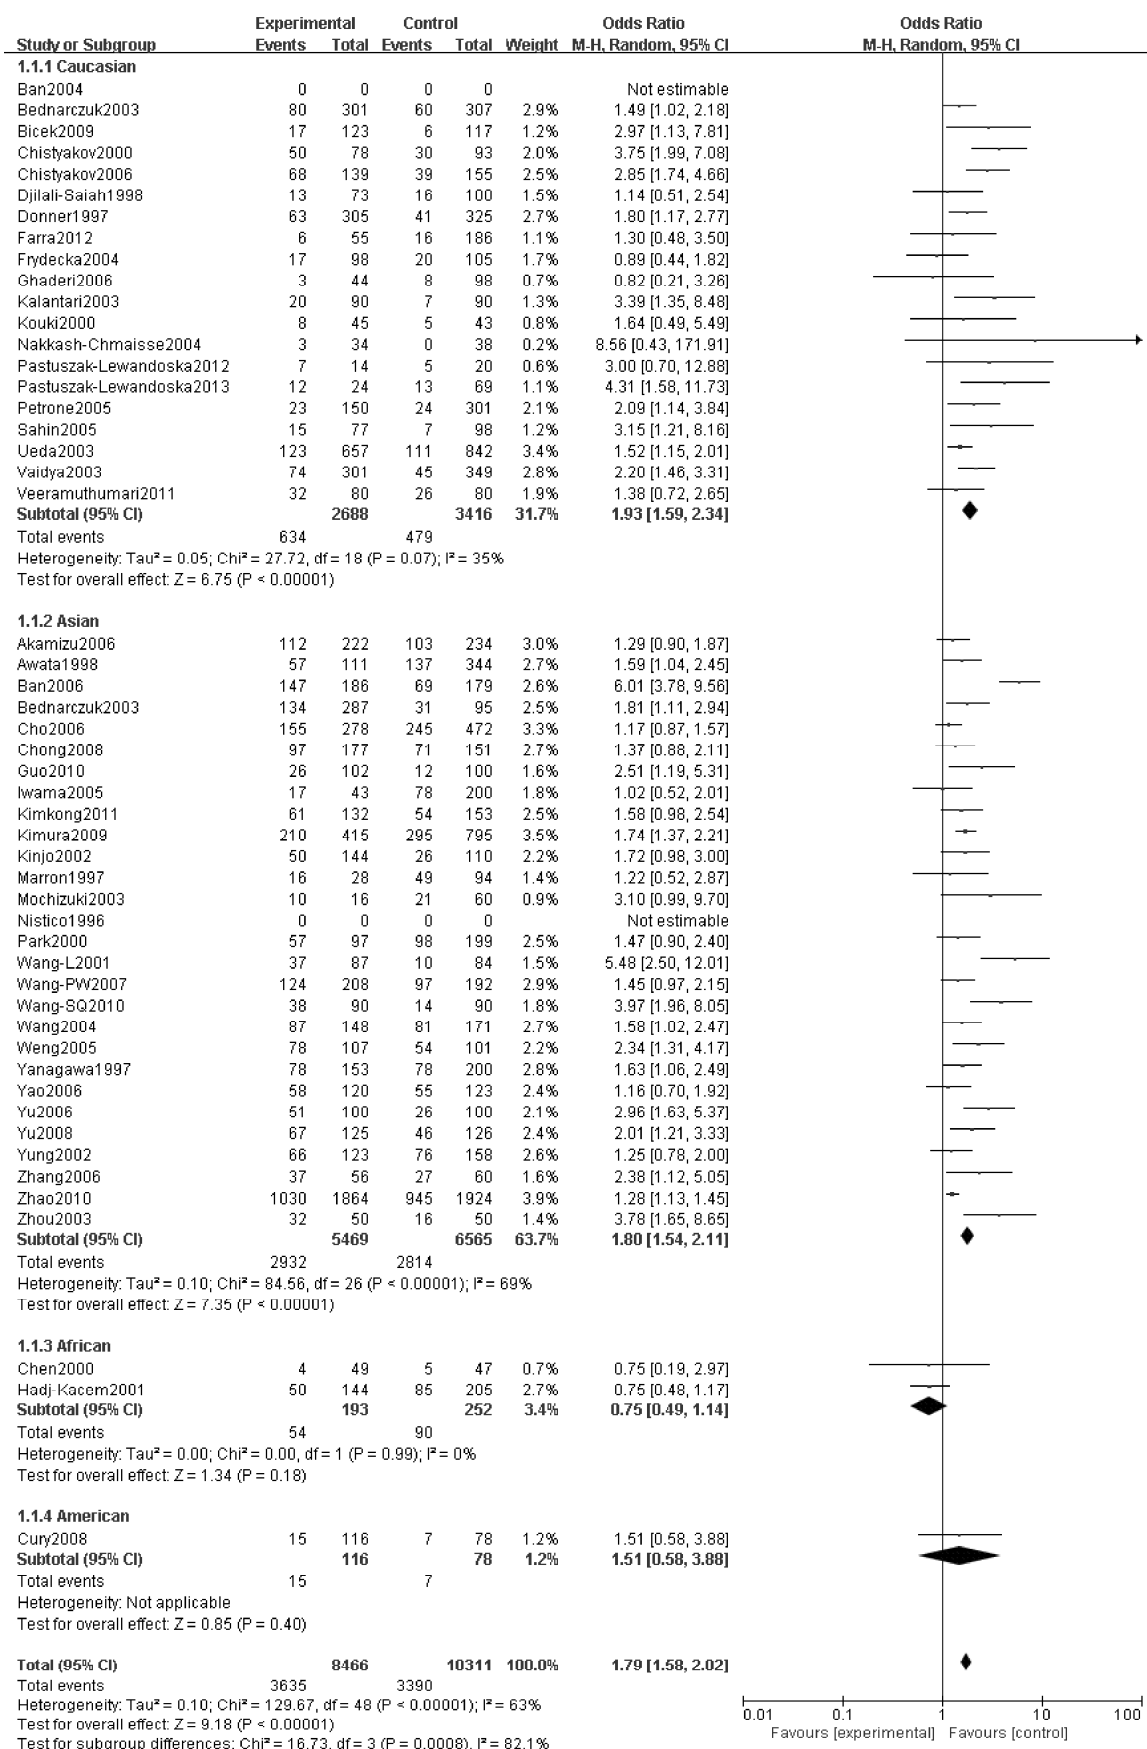

Supplemental Figure 2 Forest plot of the association between a recessive model of A49G polymorphism and GD.

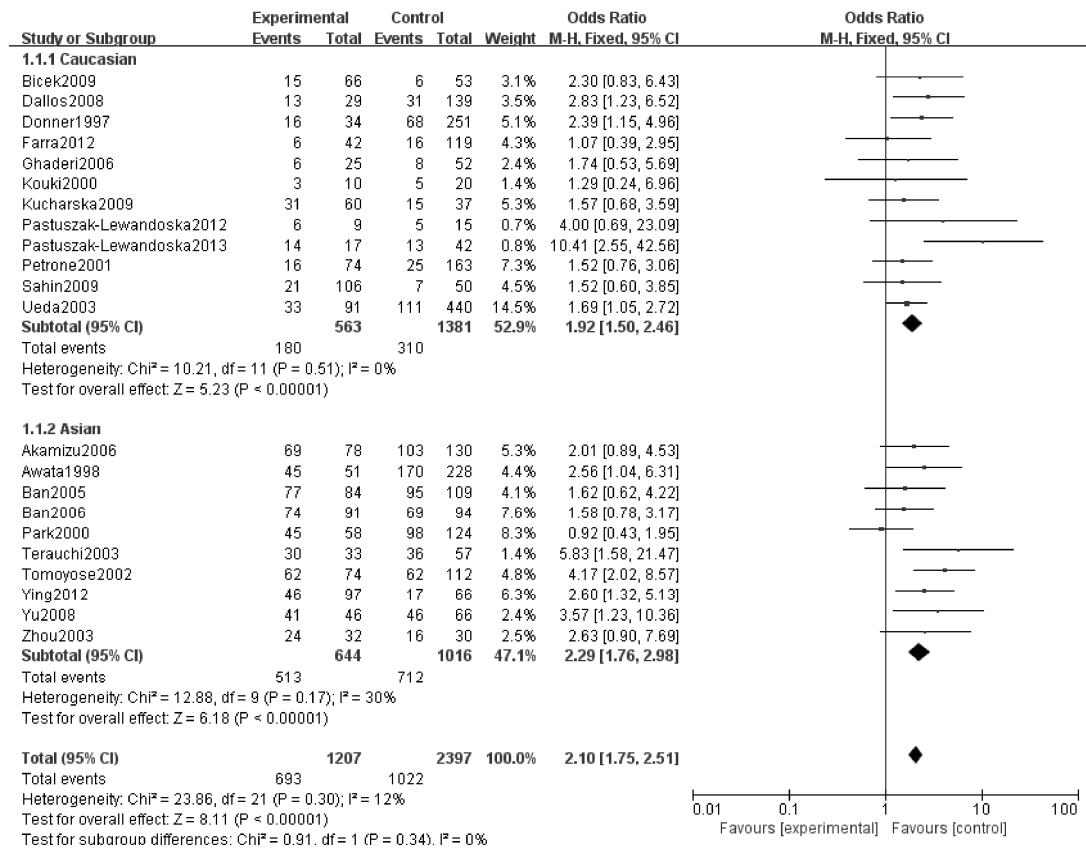

Supplemental Figure 3 Forest plot of the association between an additive model of A49G polymorphism and HT.

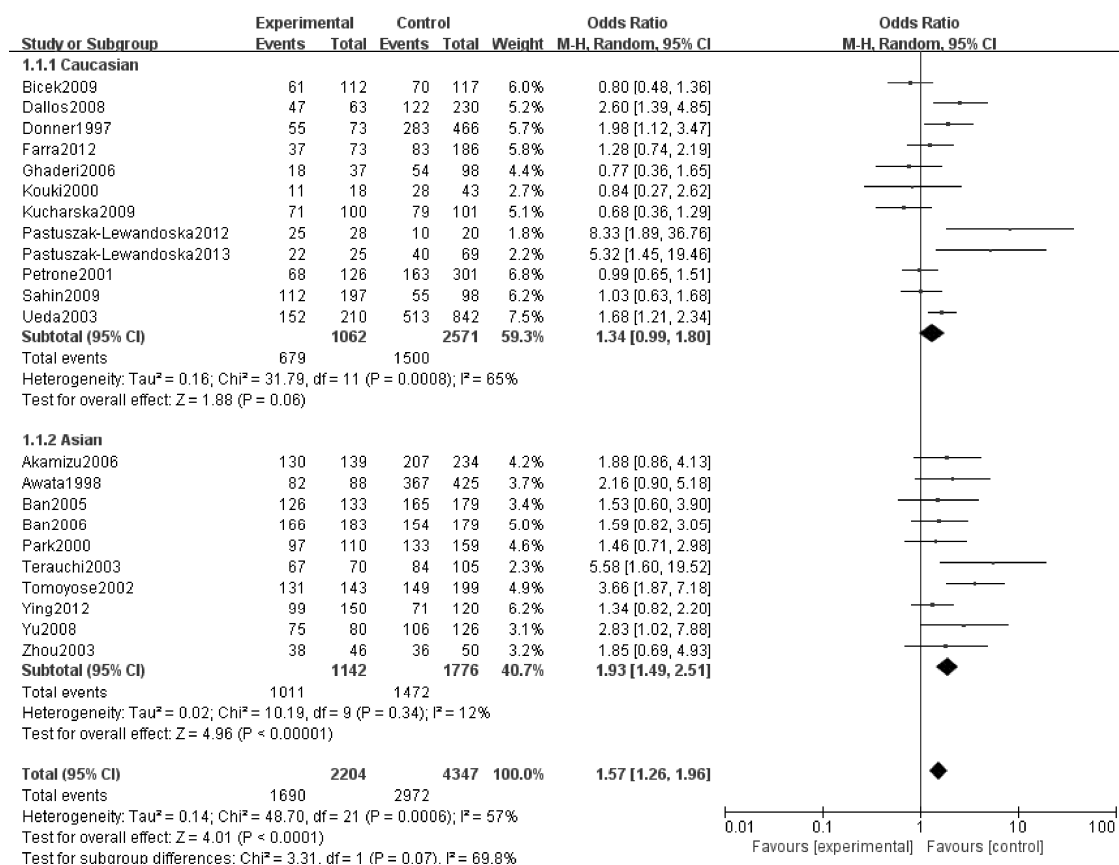

Supplemental Figure 4 Forest plot of the association between a dominant model of A49G

polymorphism and HT.

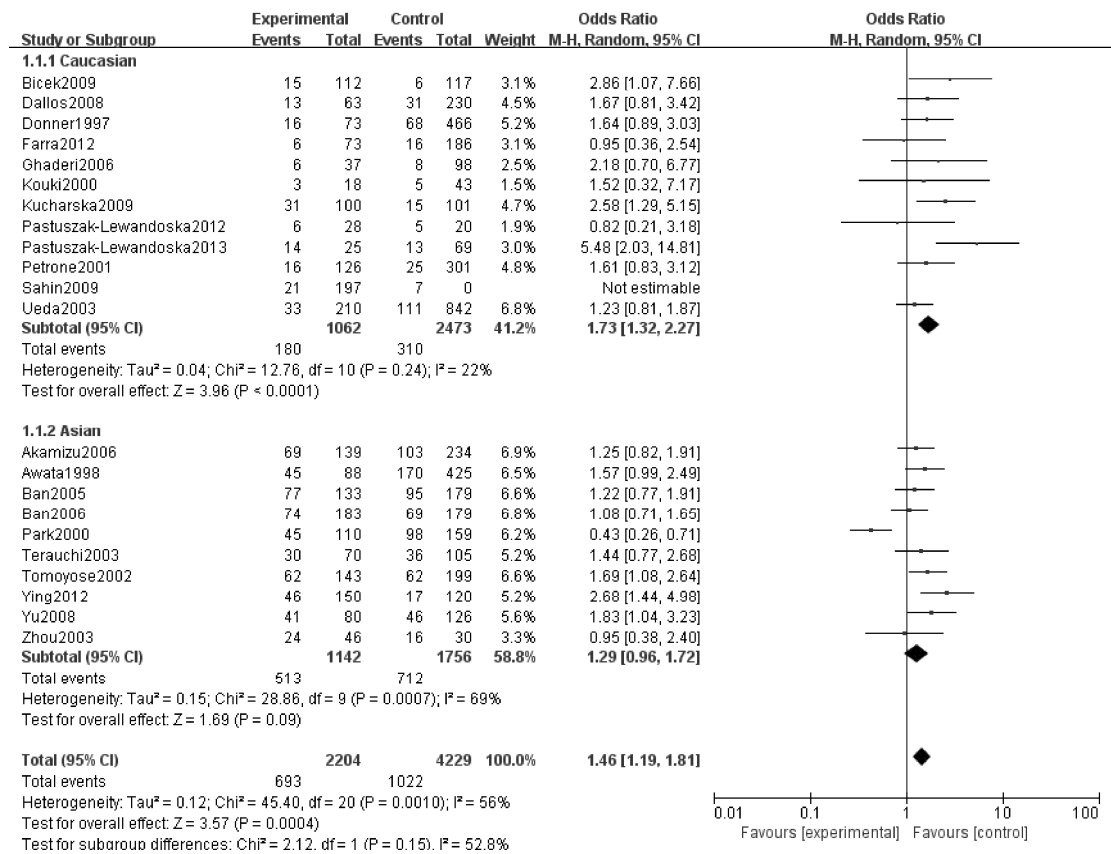

Supplemental Figure 5 Forest plot of the association between a recessive model of A49G

polymorphism and HT.

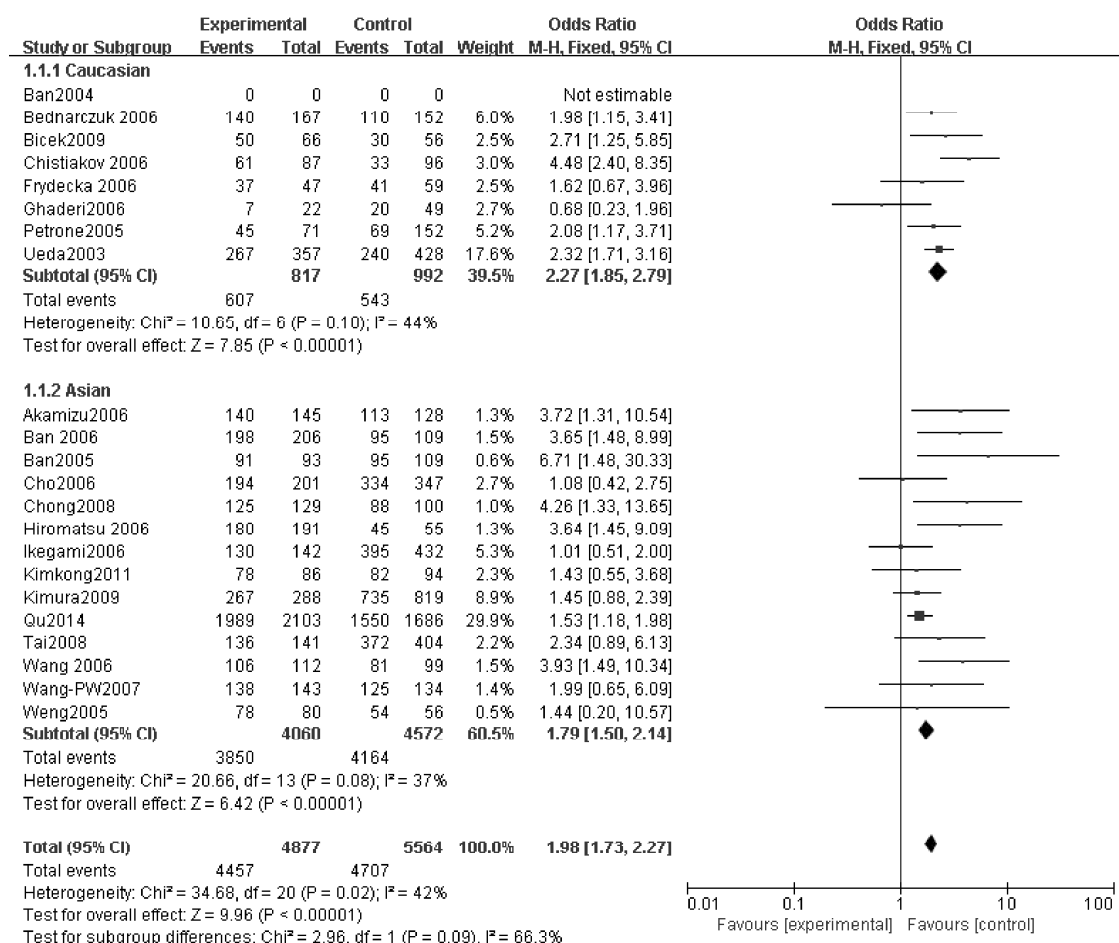

Supplemental Figure 6 Forest plot of the association between an additive model of CT60

polymorphism and GD.

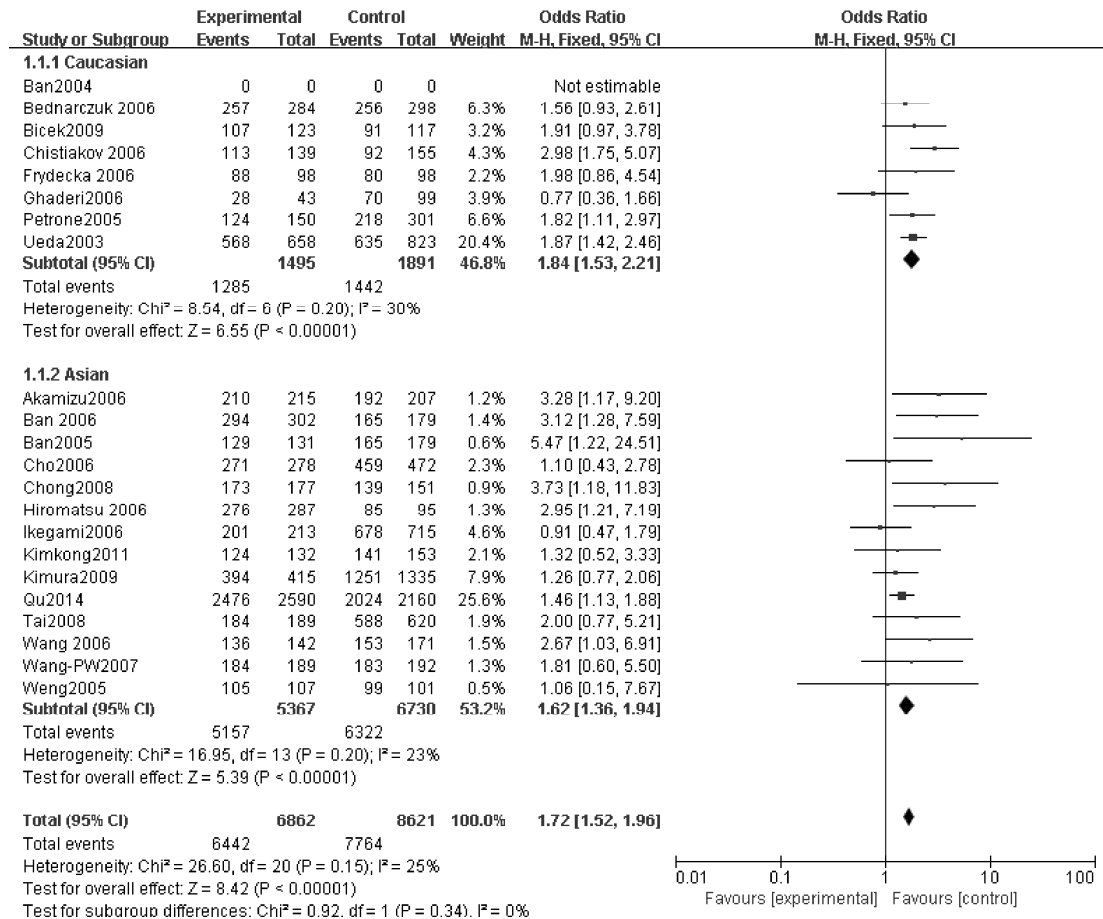

Supplemental Figure 7 Forest plot of the association between a dominant model of CT60 polymorphism and GD.



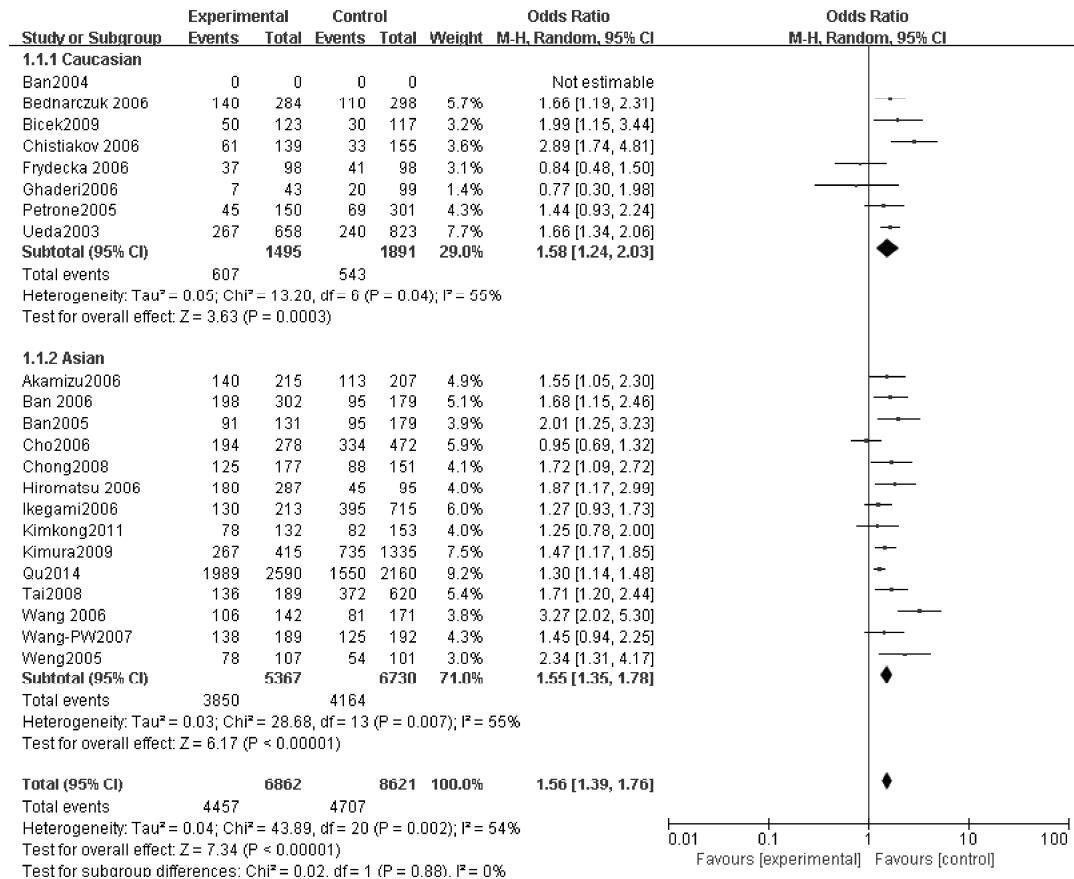

Supplemental Figure 8 Forest plot of the association between a recessive model of CT60 polymorphism and GD.

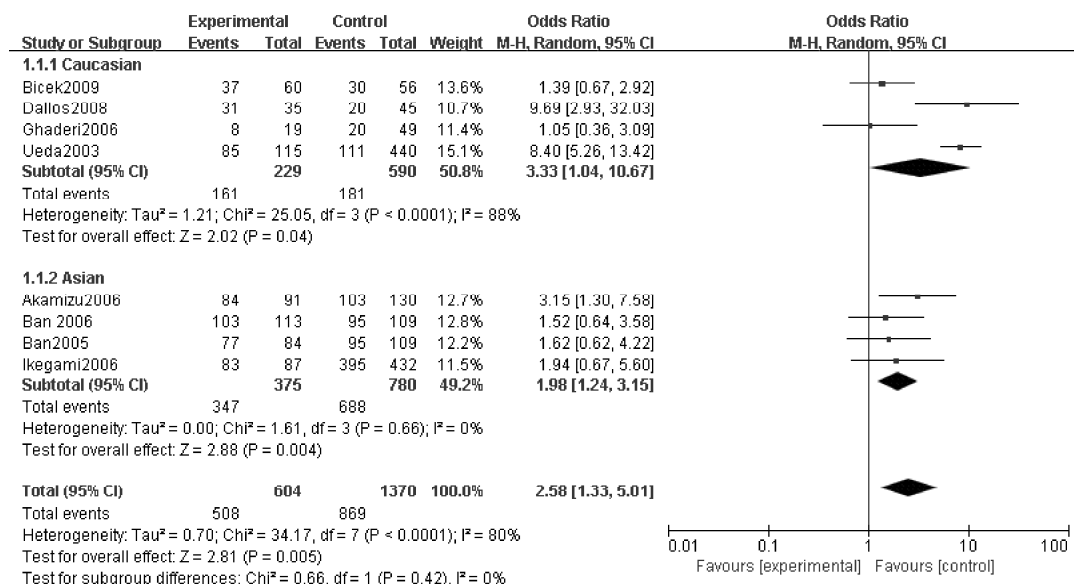

Supplemental Figure 9 Forest plot of the association between an additive model of CT60 polymorphism and HT.

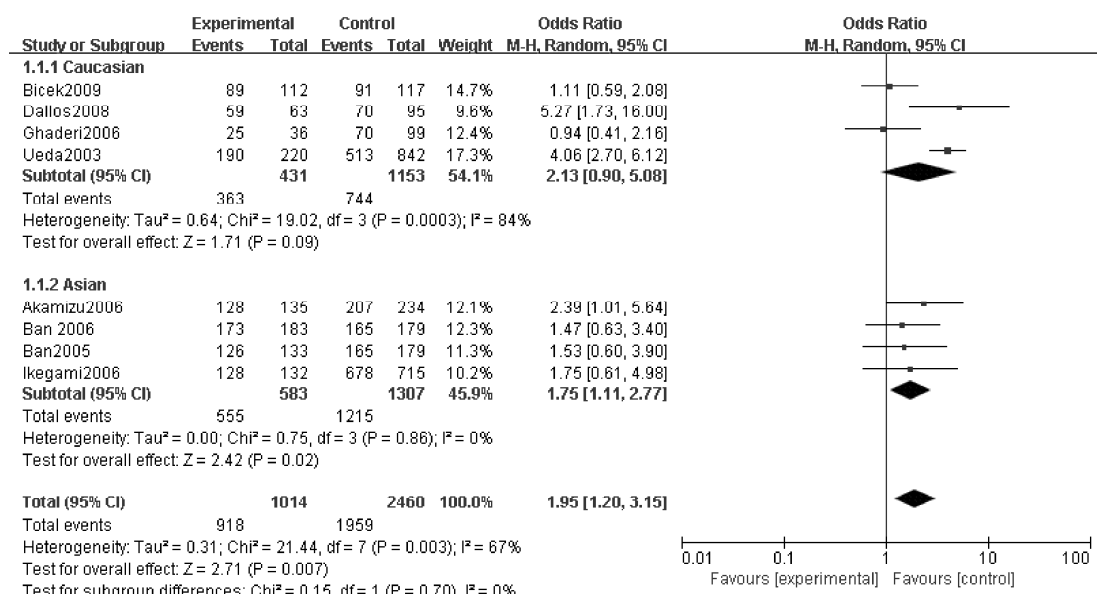

Supplemental Figure 10 Forest plot of the association between a dominant model of CT60 polymorphism and HT.

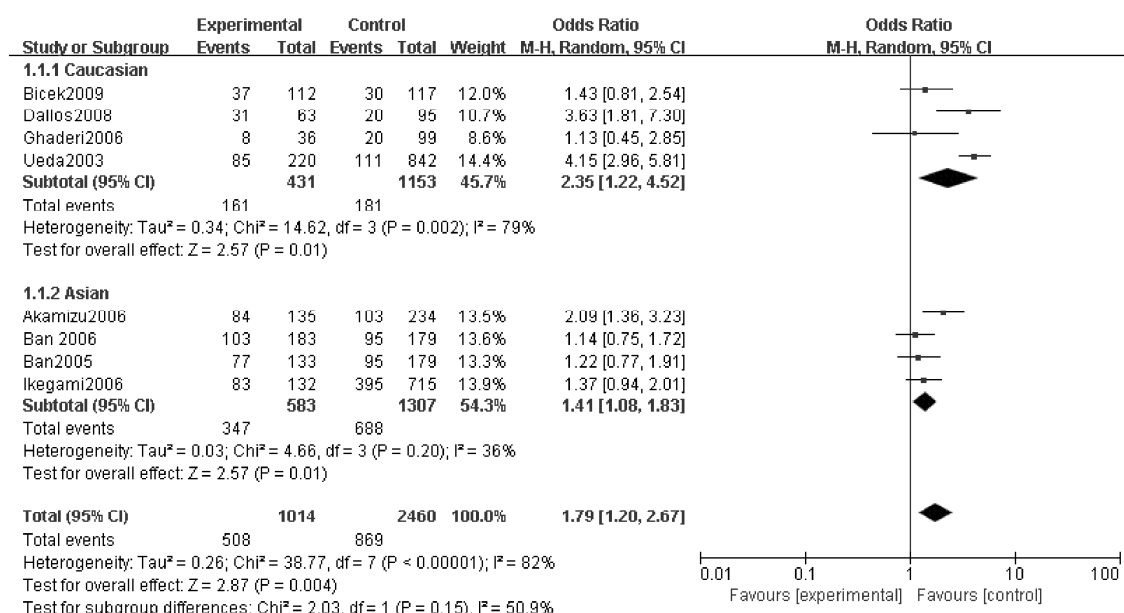

Supplemental Figure 11 Forest plot of the association between a recessive model of CT60 polymorphism and HT.
